# Supplementary material for: Origin of high piezoelectricity of a bismuth-based organic–inorganic hybrid crystal
Source: Royal Society of Chemistry journal article supplement (doi:10.1039/d2tc04002f), 2022-12-14
Supplement: d2tc04002f1.pdf [file d2tc04002f1.pdf]

## **Origin of high piezoelectricity of a Bismuth-based organic-inorganic hybrid crystal**

Zongyi Zhang<sup>1</sup>, Yifan Zhang<sup>1</sup>, Yue Zhao<sup>2</sup>, Minglei Zhao<sup>3</sup>, Ruyue Zhang<sup>1</sup>, Junyi Guo<sup>1</sup>,  
Fuhao An<sup>1</sup>, Xuan Sun<sup>1\*</sup>

<sup>1</sup> School of Chemistry and Chemical Engineering, Shandong University, Jinan 250100, China

<sup>2</sup> State Key Laboratory of Crystal Materials, Shandong University, Jinan 250100, China

<sup>3</sup> School of Physics, Shandong University, Jinan 250100, China

\* Corresponding author E-mail: [sunxuan@sdu.edu.cn](mailto:sunxuan@sdu.edu.cn)

## S1. DFT calculations

The initial configurations of *R*-BB and *S*-BB were constructed from the single crystal structure without structural optimization. The single point energy and excited state calculation of *R*-BB and *S*-BB were performed by Gaussian. Both single point energy and excited state were calculated using B3LYP functional and def2-SVP basis set. The obtained data were analyzed in Multiwfn, and the VMD was used to draw the image.

## S2. The calculation method of 36 vibration mode [1,2]

The frequency constant of the face shear vibration for a square plate sample can be calculated by

$$f_r \cdot l = \frac{F}{2} \sqrt{\frac{1}{\rho s_{66}^E}}$$

from the measured resonance frequency, the elastic compliance of the face shear vibration  $s_{66}^E$  ( $10^{-12} \text{m}^2/\text{N}$ ) can be determined by

$$s_{66}^E = \frac{F^2}{4\rho(f_r l)^2}$$

where  $l$  (m) is the electrode length,  $\rho$  ( $\text{kg}/\text{m}^3$ ) is the crystal density, and  $f_r$  (MHz) is

the resonance frequency,  $F$  is a correction constant with value equal to  $F = \frac{2\kappa_0\alpha}{\pi}$ ,  $\kappa_0=2.0288$  and  $\alpha \cong 1$ .

The electromechanical coupling factor  $k_{36}$  is given by

$$k_{36}^2 = 1 - \left(\frac{f_r}{f_a}\right)^2$$

where  $f_a$  (MHz) is the antiresonance frequency.

The shear piezoelectric constant  $d_{36}$  of the single crystal for a square plate sample can be calculated by

$$d_{36} = k_{36} \sqrt{\varepsilon_{33}^T s_{66}^E}$$

$$\varepsilon_{33}^T = \frac{C^T t}{lw}$$

$\epsilon_{33}^T$  (pF/m) is the 33 component of the free dielectric constant, w (m) is the electrode width, and t (m) is the electrode thickness.

Thus the final calculated result of  $k_{36}$  is 42.2% and  $d_{36}$  is 46.54 pC/N.

### S3. Supplementary Data

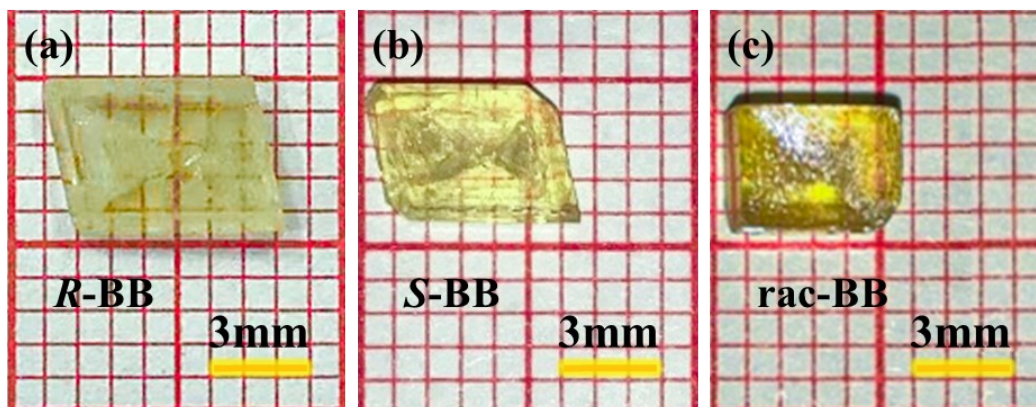

Figure S1. (a) R-BB, (b) S-BB and (c) rac-BB crystal macro topography

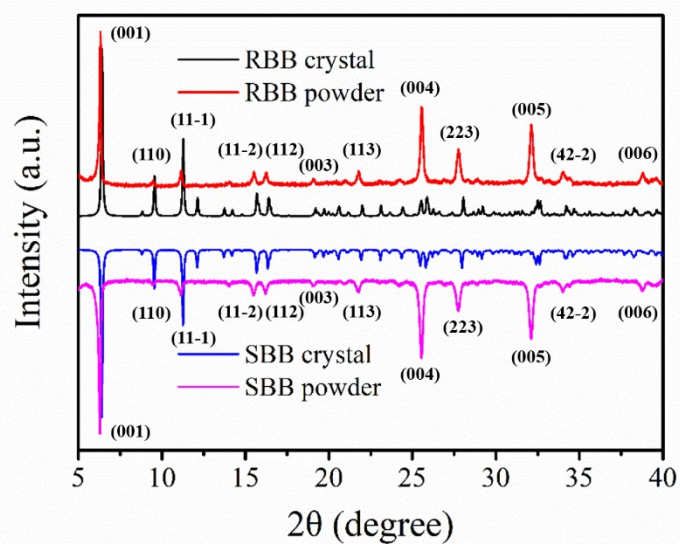

Figure S2. Comparison of single crystal XRD and PXRD of R-BB and S-BB

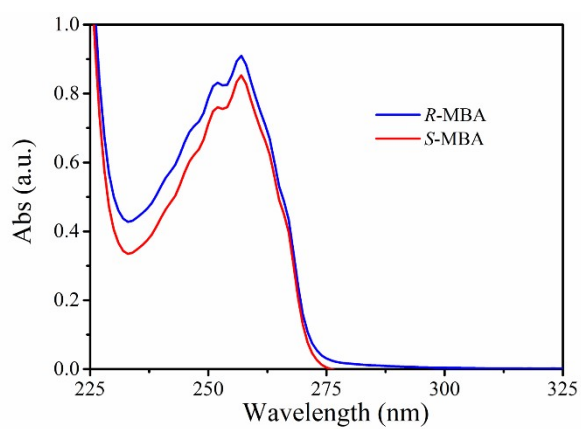

Figure S3. UV-Vis absorption spectrum of the R-MBA and S-MBA ligands

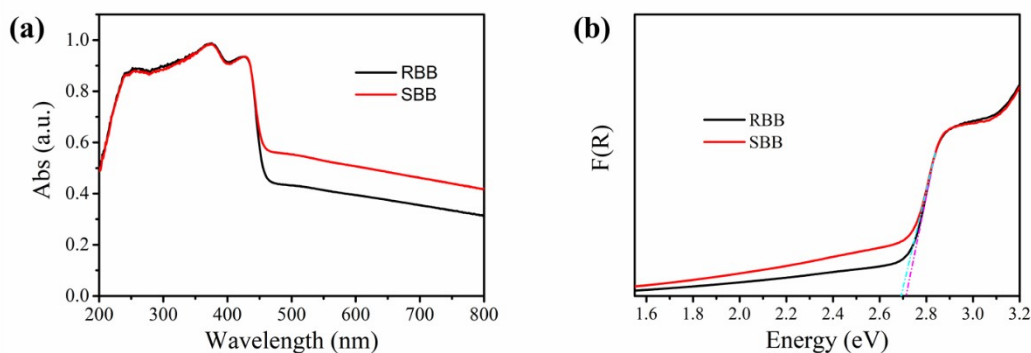

**Figure S4.** (a) UV-Vis DRS and (b) UV-Vis DRS spectrum corresponding Kubelka-Munk-transformed reflectance spectrum of *R*-BB and *S*-BB crystals

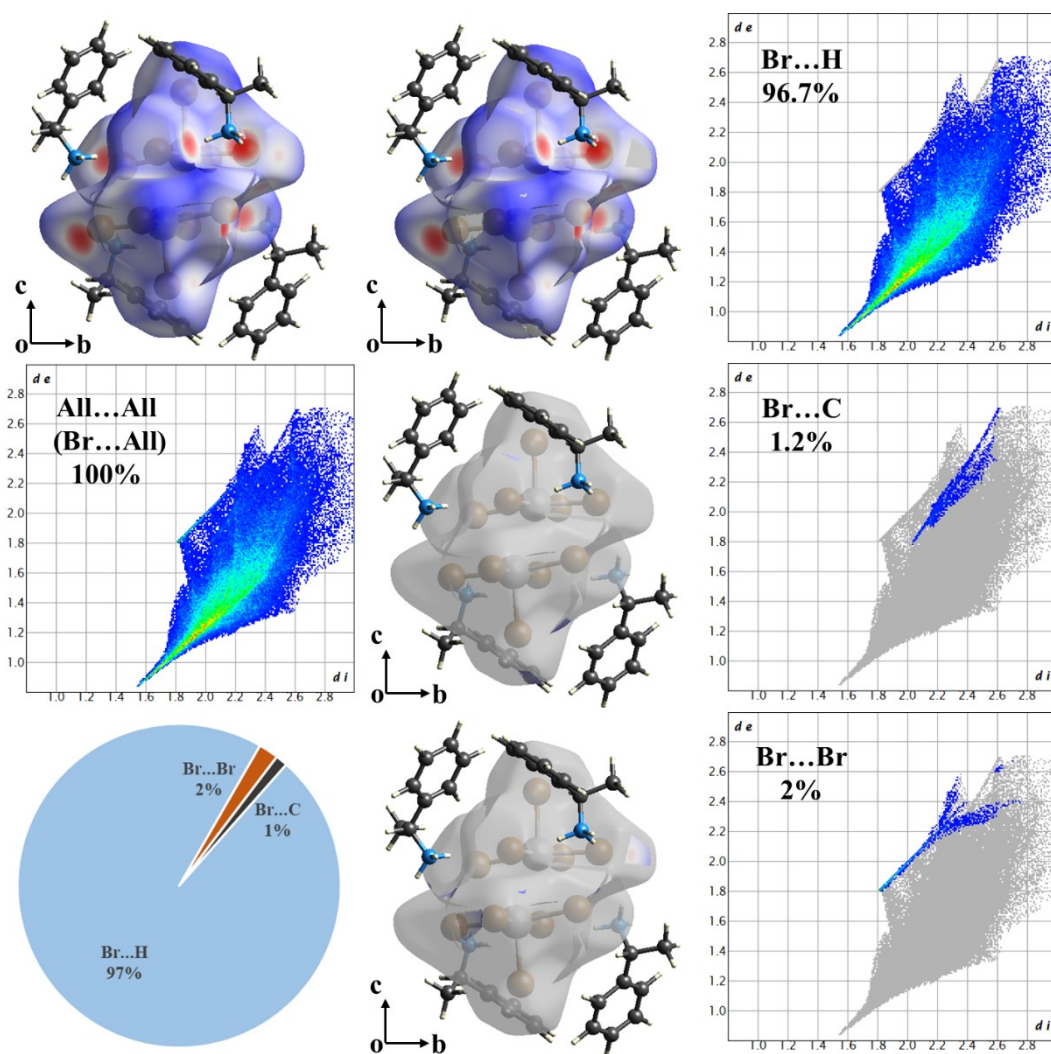

**Figure S5.** Hirshfeld Surface analysis of the close contact interactions within the *R*-BB crystal.

The two-dimensional fingerprint plots provided show several types of interactions. The intermolecular contact [H...Br] has the highest contribution to 96.7%, which confirms the greatest number of H-bonds observed in the crystal structure and indicates the dominate contribution to the dipoles formation.

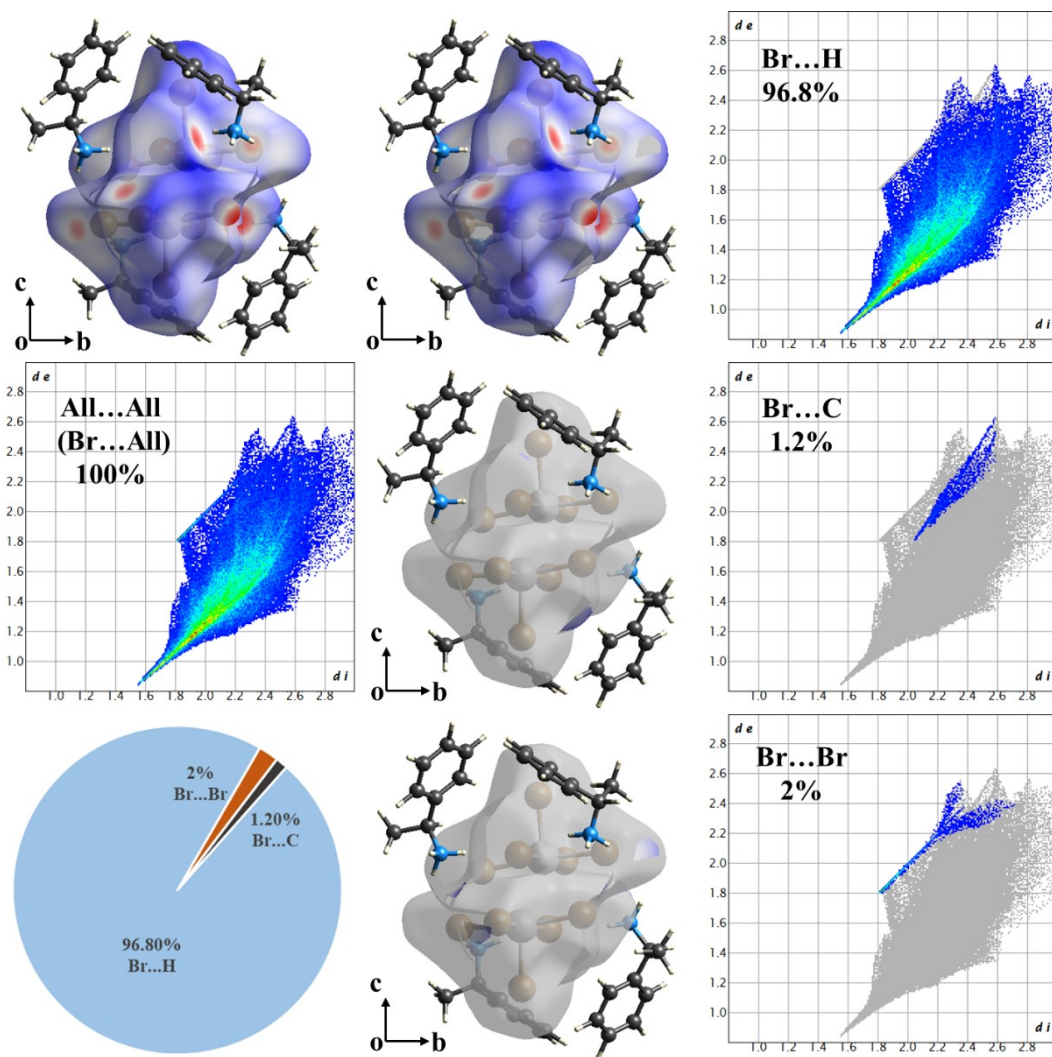

**Figure S6.** Hirshfeld Surface analysis of the close contact interactions within the S-BB crystal. The intermolecular contact [H...Br] has the highest contribution to 96.8%

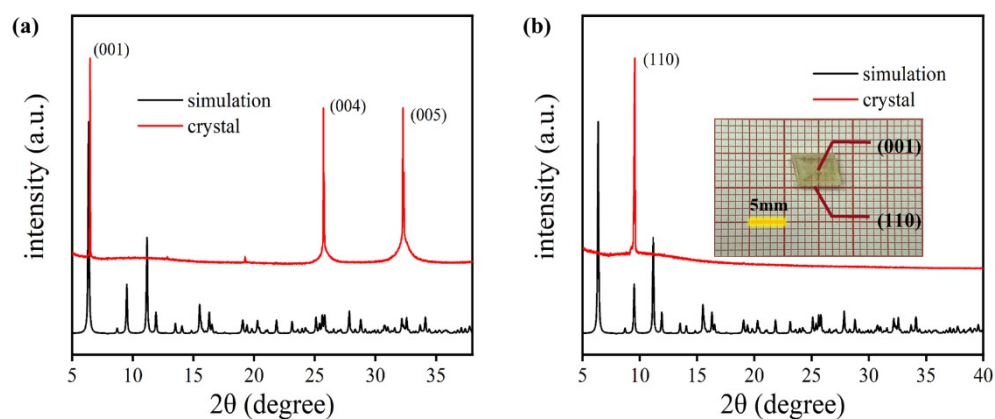

**Figure S7.** XRD was performed in different directions of the crystal to determine the crystal orientation and identify the (001) and (110) crystal faces



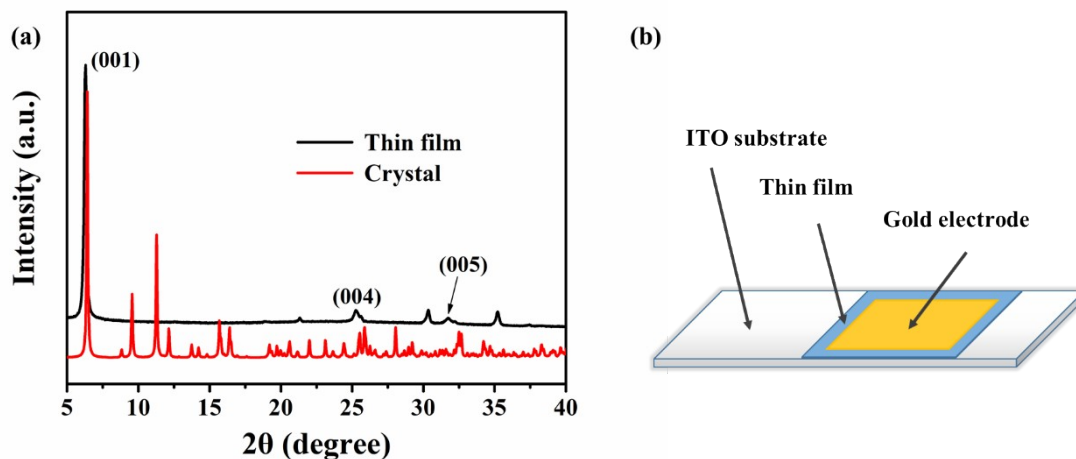

**Figure S8.** (a) Crystal orientation identification of thin film and (b) Schematic diagram of thin film sample preparation

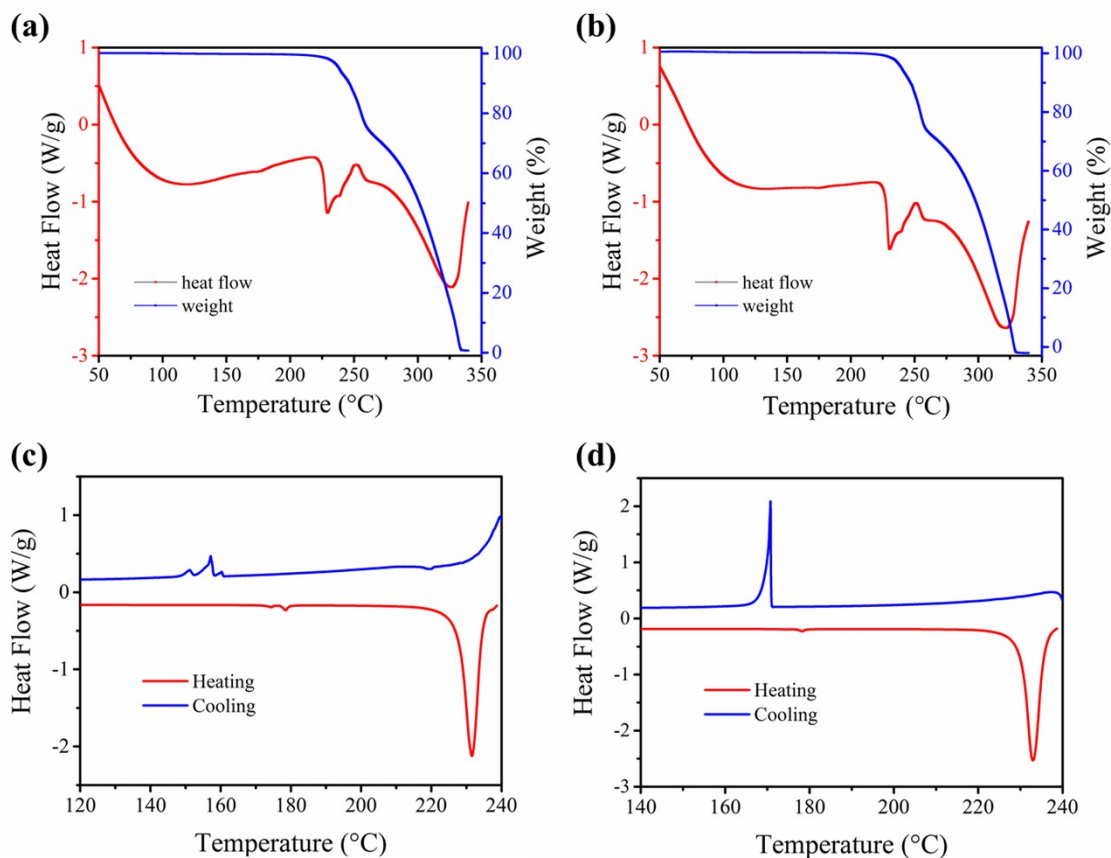

**Figure S9.** Simultaneous thermal analysis images of (a) *R*-BB and (b) *S*-BB and DSC images of (c) *R*-BB and (d) *S*-BB. If the temperature rises near the melting temperature, a pair of endothermic and exothermic peaks can be clearly seen on the DSC image, while exothermic peaks cannot be seen if the end point is far away from the melting temperature.

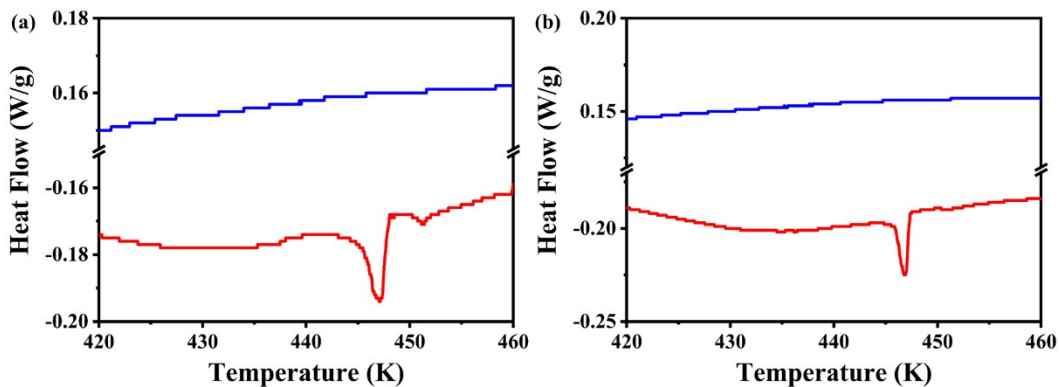

**Figure S10.** DSC images of (a) R-BB and (b) S-BB. No exothermic peaks appear when the end point is far away from the melting temperature.

**Table S1.** Crystallographic data sheet of *R*-BB, *S*-BB and rac-BB

| Compound                                      | <i>R</i> -BB                         | <i>S</i> -BB                         | rac-BB                               |
|-----------------------------------------------|--------------------------------------|--------------------------------------|--------------------------------------|
| Empirical formula                             | $C_{32}H_{48}Bi_2Br_{10}N_4$         | $C_{32}H_{48}Bi_2Br_{10}N_4$         | $C_{32}H_{48}Bi_2Br_{10}N_4$         |
| Formula weight                                | 1705.80                              | 1705.80                              | 1705.80                              |
| Temperature/K                                 | 173.0                                | 173.0                                | 173.0                                |
| Crystal system                                | monoclinic                           | monoclinic                           | monoclinic                           |
| Space group                                   | $P2_1$                               | $P2_1$                               | $P2_1/c$                             |
| $a/\text{\AA}$                                | 11.9715(10)                          | 11.9892(15)                          | 13.7062(7)                           |
| $b/\text{\AA}$                                | 14.5680(11)                          | 14.601(2)                            | 14.5646(7)                           |
| $c/\text{\AA}$                                | 13.7897(13)                          | 13.821(2)                            | 11.9207(6)                           |
| $\alpha/^\circ$                               | 90                                   | 90                                   | 90                                   |
| $\beta/^\circ$                                | 93.389(3)                            | 93.225(4)                            | 93.110(2)                            |
| $\gamma/^\circ$                               | 90                                   | 90                                   | 90                                   |
| Volume/ $\text{\AA}^3$                        | 2400.7(4)                            | 2415.5(6)                            | 2376.2(2)                            |
| $Z$                                           | 2                                    | 2                                    | 2                                    |
| $\rho_{\text{calc}}/\text{cm}^3$              | 2.360                                | 2.345                                | 2.384                                |
| $\mu/\text{mm}^{-1}$                          | 15.668                               | 15.572                               | 15.830                               |
| $F(000)$                                      | 1568.0                               | 1568.0                               | 1568.0                               |
| Crystal size/ $\text{mm}^3$                   | $0.1 \times 0.08 \times 0.08$        | $0.1 \times 0.1 \times 0.08$         | $0.1 \times 0.08 \times 0.08$        |
| Radiation                                     | MoK $\alpha$ ( $\lambda = 0.71073$ ) | MoK $\alpha$ ( $\lambda = 0.71073$ ) | MoK $\alpha$ ( $\lambda = 0.71073$ ) |
| $2\theta$ range for data collection/ $^\circ$ | 3.408 to 56.666                      | 3.402 to 55.842                      | 4.084 to 55.04                       |
| Index ranges                                  | $-15 \leq h \leq 15,$                | $-15 \leq h \leq 15,$                | $-17 \leq h \leq 17,$                |



|                                             |                                                                   |                                                                   |                                                                  |
|---------------------------------------------|-------------------------------------------------------------------|-------------------------------------------------------------------|------------------------------------------------------------------|
|                                             | -19 ≤ k ≤ 19,<br>-18 ≤ l ≤ 18                                     | -19 ≤ k ≤ 19,<br>-18 ≤ l ≤ 18                                     | -18 ≤ k ≤ 18,<br>-15 ≤ l ≤ 15                                    |
| Reflections collected                       | 37239                                                             | 70209                                                             | 32491                                                            |
| Independent reflections                     | 11740 [R <sub>int</sub> = 0.0685,<br>R <sub>sigma</sub> = 0.0746] | 11393 [R <sub>int</sub> = 0.0855,<br>R <sub>sigma</sub> = 0.0563] | 5364 [R <sub>int</sub> = 0.0658,<br>R <sub>sigma</sub> = 0.0422] |
| Data/restraints/parameters                  | 11740/163/442                                                     | 11393/217/442                                                     | 5364/108/222                                                     |
| Goodness-of-fit on F <sup>2</sup>           | 0.963                                                             | 1.007                                                             | 1.016                                                            |
| Final R indexes [I ≥ 2σ (I)]                | R <sub>1</sub> = 0.0364,<br>wR <sub>2</sub> = 0.0660              | R <sub>1</sub> = 0.0321,<br>wR <sub>2</sub> = 0.0697              | R <sub>1</sub> = 0.0253,<br>wR <sub>2</sub> = 0.0535             |
| Final R indexes [all data]                  | R <sub>1</sub> = 0.0522,<br>wR <sub>2</sub> = 0.0714              | R <sub>1</sub> = 0.0410,<br>wR <sub>2</sub> = 0.0734              | R <sub>1</sub> = 0.0350,<br>wR <sub>2</sub> = 0.0565             |
| Largest diff. peak/hole / e Å <sup>-3</sup> | 1.03/-0.64                                                        | 1.10/-1.17                                                        | 0.83/-0.87                                                       |
| Flack parameter                             | -0.026(9)                                                         | -0.011(7)                                                         | /                                                                |

**Table S2.** The bond length of the Bi-Br bond of crystal (RMBA)<sub>4</sub>Bi<sub>2</sub>Br<sub>10</sub>

| Atom | Atom | Length/Å   | Atom | Atom | Length/Å   |
|------|------|------------|------|------|------------|
| Bi1  | Br1  | 3.1369(17) | Bi2  | Br1  | 3.0040(14) |
| Bi1  | Br3  | 2.6859(18) | Bi2  | Br2  | 2.6882(18) |
| Bi1  | Br4  | 2.8482(16) | Bi2  | Br5  | 2.7599(14) |
| Bi1  | Br6  | 2.8498(16) | Bi2  | Br7  | 3.1141(17) |
| Bi1  | Br7  | 3.0288(13) | Bi2  | Br8  | 2.8304(16) |
| Bi1  | Br9  | 2.7165(14) | Bi2  | Br10 | 2.8583(16) |

**Table S3.** The Br-Bi-Br bond angles of crystal (RMBA)<sub>4</sub>Bi<sub>2</sub>Br<sub>10</sub>

| Atom | Atom | Atom | Angle/°   | Atom | Atom | Atom | Angle/°   |
|------|------|------|-----------|------|------|------|-----------|
| Br3  | Bi1  | Br1  | 168.90(4) | Br2  | Bi2  | Br1  | 89.77(4)  |
| Br3  | Bi1  | Br4  | 89.71(5)  | Br2  | Bi2  | Br5  | 91.03(5)  |
| Br3  | Bi1  | Br6  | 96.98(5)  | Br2  | Bi2  | Br7  | 172.22(4) |
| Br3  | Bi1  | Br7  | 86.67(4)  | Br2  | Bi2  | Br8  | 89.89(5)  |
| Br3  | Bi1  | Br9  | 93.69(5)  | Br2  | Bi2  | Br10 | 97.88(5)  |
| Br4  | Bi1  | Br1  | 86.31(5)  | Br5  | Bi2  | Br1  | 178.18(5) |
| Br4  | Bi1  | Br6  | 173.24(6) | Br5  | Bi2  | Br7  | 95.57(5)  |

|     |     |     |           |      |     |      |           |
|-----|-----|-----|-----------|------|-----|------|-----------|
| Br4 | Bi1 | Br7 | 89.82(5)  | Br5  | Bi2 | Br8  | 89.27(5)  |
| Br6 | Bi1 | Br1 | 86.93(5)  | Br5  | Bi2 | Br10 | 89.15(5)  |
| Br6 | Bi1 | Br7 | 89.58(4)  | Br8  | Bi2 | Br1  | 92.37(4)  |
| Br7 | Bi1 | Br1 | 82.96(4)  | Br8  | Bi2 | Br7  | 86.08(5)  |
| Br9 | Bi1 | Br1 | 96.69(5)  | Br8  | Bi2 | Br10 | 172.09(5) |
| Br9 | Bi1 | Br4 | 90.50(5)  | Br10 | Bi2 | Br1  | 89.12(4)  |
| Br9 | Bi1 | Br6 | 90.07(5)  | Br10 | Bi2 | Br7  | 86.36(5)  |
| Br9 | Bi1 | Br7 | 179.52(6) | Bi2  | Br1 | Bi1  | 96.60(4)  |
| Br1 | Bi2 | Br7 | 83.75(4)  | Bi1  | Br7 | Bi2  | 96.57(4)  |

**Table S4.** The bond length of the Bi-Br bond of crystal (SMBA)<sub>4</sub>Bi<sub>2</sub>Br<sub>10</sub>

| Atom | Atom | Length/Å   | Atom | Atom | Length/Å   |
|------|------|------------|------|------|------------|
| Bi1  | Br1  | 2.8554(14) | Bi2  | Br3  | 3.0061(11) |
| Bi1  | Br2  | 2.6898(15) | Bi2  | Br4  | 3.1206(14) |
| Bi1  | Br3  | 3.1486(14) | Bi2  | Br5  | 2.6964(14) |
| Bi1  | Br4  | 3.0325(11) | Bi2  | Br6  | 2.8647(14) |
| Bi1  | Br8  | 2.8606(14) | Bi2  | Br7  | 2.8351(14) |
| Bi1  | Br10 | 2.7187(11) | Bi2  | Br9  | 2.7646(12) |

**Table S5.** The Br-Bi-Br bond angles of crystal (SMBA)<sub>4</sub>Bi<sub>2</sub>Br<sub>10</sub>

| Atom | Atom | Atom | Angle/°   | Atom | Atom | Atom | Angle/°   |
|------|------|------|-----------|------|------|------|-----------|
| Br1  | Bi1  | Br3  | 86.32(4)  | Br5  | Bi2  | Br3  | 89.82(4)  |
| Br1  | Bi1  | Br4  | 89.83(4)  | Br5  | Bi2  | Br4  | 172.23(3) |
| Br1  | Bi1  | Br8  | 173.26(4) | Br5  | Bi2  | Br6  | 97.86(5)  |
| Br2  | Bi1  | Br1  | 89.68(4)  | Br5  | Bi2  | Br7  | 90.02(4)  |
| Br2  | Bi1  | Br3  | 168.90(3) | Br5  | Bi2  | Br9  | 90.82(4)  |
| Br2  | Bi1  | Br4  | 86.83(4)  | Br6  | Bi2  | Br3  | 89.09(4)  |
| Br2  | Bi1  | Br8  | 97.00(4)  | Br6  | Bi2  | Br4  | 86.38(4)  |
| Br2  | Bi1  | Br10 | 93.59(4)  | Br7  | Bi2  | Br3  | 92.42(3)  |
| Br4  | Bi1  | Br3  | 82.81(3)  | Br7  | Bi2  | Br4  | 85.97(4)  |
| Br8  | Bi1  | Br3  | 86.95(4)  | Br7  | Bi2  | Br6  | 171.99(4) |
| Br8  | Bi1  | Br4  | 89.60(4)  | Br9  | Bi2  | Br3  | 178.25(4) |

|      |     |     |           |     |     |     |          |
|------|-----|-----|-----------|-----|-----|-----|----------|
| Br10 | Bi1 | Br1 | 90.38(4)  | Br9 | Bi2 | Br4 | 95.77(4) |
| Br10 | Bi1 | Br3 | 96.78(4)  | Br9 | Bi2 | Br6 | 89.21(4) |
| Br10 | Bi1 | Br4 | 179.52(5) | Br9 | Bi2 | Br7 | 89.20(4) |
| Br10 | Bi1 | Br8 | 90.14(4)  | Bi2 | Br3 | Bi1 | 96.65(3) |
| Br3  | Bi2 | Br4 | 83.71(3)  | Bi1 | Br4 | Bi2 | 96.70(3) |

**Table S6.** The bond length of the Bi-Br bond of crystal (rac-MBA)<sub>2</sub>BiBr<sub>5</sub>

| Atom | Atom | Length/Å  | Atom | Atom             | Length/Å  |
|------|------|-----------|------|------------------|-----------|
| Bi1  | Br1  | 2.8395(4) | Bi1  | Br4              | 3.0152(5) |
| Bi1  | Br2  | 2.7460(5) | Bi1  | Br4 <sup>1</sup> | 3.1146(4) |
| Bi1  | Br3  | 2.6874(5) | Bi1  | Br5              | 2.8663(4) |

**Table S7.** The Br-Bi-Br bond angles of crystal (rac-MBA)<sub>2</sub>BiBr<sub>5</sub>

| Atom | Atom | Atom             | Angle/°     | Atom | Atom | Atom             | Angle/°     |
|------|------|------------------|-------------|------|------|------------------|-------------|
| Br1  | Bi1  | Br4 <sup>1</sup> | 86.820(12)  | Br3  | Bi1  | Br2              | 93.177(15)  |
| Br1  | Bi1  | Br4              | 87.421(13)  | Br3  | Bi1  | Br4              | 87.096(14)  |
| Br1  | Bi1  | Br5              | 173.413(13) | Br3  | Bi1  | Br4 <sup>1</sup> | 168.769(15) |
| Br2  | Bi1  | Br1              | 89.574(14)  | Br3  | Bi1  | Br5              | 89.342(13)  |
| Br2  | Bi1  | Br4 <sup>1</sup> | 97.332(14)  | Br4  | Bi1  | Br4 <sup>1</sup> | 82.618(13)  |
| Br2  | Bi1  | Br4              | 176.993(14) | Br5  | Bi1  | Br4 <sup>1</sup> | 86.712(12)  |
| Br2  | Bi1  | Br5              | 90.018(14)  | Br5  | Bi1  | Br4              | 92.979(13)  |
| Br3  | Bi1  | Br1              | 97.245(14)  | Bi1  | Br4  | Bi1 <sup>1</sup> | 97.383(13)  |

**Table S8.** Crystallographic data sheet for *R*-BB and *S*-BB after heat treatment

| Compound          | <i>R</i> -BB                                                                    | <i>S</i> -BB                                                                    |
|-------------------|---------------------------------------------------------------------------------|---------------------------------------------------------------------------------|
| Empirical formula | C <sub>32</sub> H <sub>48</sub> Bi <sub>2</sub> Br <sub>10</sub> N <sub>4</sub> | C <sub>32</sub> H <sub>48</sub> Bi <sub>2</sub> Br <sub>10</sub> N <sub>4</sub> |
| Formula weight    | 1705.80                                                                         | 1705.80                                                                         |
| Temperature/K     | 173(2)                                                                          | 173(2)                                                                          |
| Crystal system    | monoclinic                                                                      | monoclinic                                                                      |
| Space group       | P2 <sub>1</sub>                                                                 | P2 <sub>1</sub>                                                                 |
| a/Å               | 12.0027(7)                                                                      | 13.7909(5)                                                                      |
| b/Å               | 14.4943(8)                                                                      | 14.4589(6)                                                                      |

|                                                |                                                                        |                                                                        |
|------------------------------------------------|------------------------------------------------------------------------|------------------------------------------------------------------------|
| $c/\text{\AA}$                                 | 13.8026(7)                                                             | 12.0013(4)                                                             |
| $\alpha/^\circ$                                | 90                                                                     | 90                                                                     |
| $\beta/^\circ$                                 | 93.175(5)                                                              | 93.108(3)                                                              |
| $\gamma/^\circ$                                | 90                                                                     | 90                                                                     |
| Volume/ $\text{\AA}^3$                         | 2397.6(2)                                                              | 2389.55(15)                                                            |
| Z                                              | 2                                                                      | 2                                                                      |
| $\rho_{\text{calc}}/\text{g/cm}^3$             | 2.363                                                                  | 2.371                                                                  |
| $\mu/\text{mm}^{-1}$                           | 15.689                                                                 | 15.742                                                                 |
| F(000)                                         | 1568.0                                                                 | 1568.0                                                                 |
| Crystal size/ $\text{mm}^3$                    | $0.060 \times 0.050 \times 0.040$                                      | $0.060 \times 0.050 \times 0.040$                                      |
| Radiation                                      | MoK $\alpha$ ( $\lambda = 0.71073$ )                                   | MoK $\alpha$ ( $\lambda = 0.71073$ )                                   |
| 2 $\Theta$ range for data collection/ $^\circ$ | 5.622 to 53.466                                                        | 4.626 to 53.464                                                        |
| Index ranges                                   | $-15 \leq h \leq 15,$<br>$-18 \leq k \leq 18,$<br>$-15 \leq l \leq 16$ | $-15 \leq h \leq 16,$<br>$-18 \leq k \leq 18,$<br>$-15 \leq l \leq 15$ |
| Reflections collected                          | 26684                                                                  | 24122                                                                  |
| Independent reflections                        | 9609 [ $R_{\text{int}} = 0.0827,$<br>$R_{\text{sigma}} = 0.0976$ ]     | 9545 [ $R_{\text{int}} = 0.0591,$<br>$R_{\text{sigma}} = 0.0884$ ]     |
| Data/restraints/parameters                     | 9609/241/441                                                           | 9545/230/441                                                           |
| Goodness-of-fit on $F^2$                       | 1.012                                                                  | 0.980                                                                  |
| Final R indexes [ $I \geq 2\sigma(I)$ ]        | $R_1 = 0.0534,$<br>$wR_2 = 0.1009$                                     | $R_1 = 0.0457,$<br>$wR_2 = 0.0831$                                     |
| Final R indexes [all data]                     | $R_1 = 0.0732,$<br>$wR_2 = 0.1062$                                     | $R_1 = 0.0649,$<br>$wR_2 = 0.0885$                                     |
| Largest diff. peak/hole / $e \text{\AA}^{-3}$  | 1.69/-2.04                                                             | 1.45/-1.59                                                             |
| Flack parameter                                | 0.025(15)                                                              | 0.017(11)                                                              |

**Table S9.** The bond length of the Bi-Br bond of crystal (RMBA)<sub>4</sub>Bi<sub>2</sub>Br<sub>10</sub> after heat treatment

| Atom | Atom | Length/ $\text{\AA}$ | Atom | Atom | Length/ $\text{\AA}$ |
|------|------|----------------------|------|------|----------------------|
| Bi1  | Br6  | 2.343(3)             | Bi2  | Br9  | 2.345(2)             |
| Bi1  | Br2  | 2.794(3)             | Bi2  | Br7  | 2.756(2)             |
| Bi1  | Br1  | 2.884(3)             | Bi2  | Br4  | 2.891(3)             |

|     |     |          |     |      |          |
|-----|-----|----------|-----|------|----------|
| Bi1 | Br5 | 2.899(3) | Bi2 | Br10 | 2.906(3) |
| Bi1 | Br3 | 3.075(3) | Bi2 | Br8  | 3.122(3) |

**Table S10.** The Br-Bi-Br bond angles of crystal (RMBA)<sub>4</sub>Bi<sub>2</sub>Br<sub>10</sub> after heat treatment

| Atom | Atom | Atom | Angle/°    | Atom | Atom | Atom | Angle/°    |
|------|------|------|------------|------|------|------|------------|
| Br6  | Bi1  | Br2  | 164.47(11) | Br9  | Bi2  | Br7  | 169.32(11) |
| Br6  | Bi1  | Br1  | 94.69(9)   | Br9  | Bi2  | Br4  | 90.92(10)  |
| Br2  | Bi1  | Br1  | 91.32(8)   | Br7  | Bi2  | Br4  | 83.28(8)   |
| Br6  | Bi1  | Br5  | 90.93(9)   | Br9  | Bi2  | Br10 | 96.06(10)  |
| Br2  | Bi1  | Br5  | 82.87(8)   | Br7  | Bi2  | Br10 | 90.14(8)   |
| Br1  | Bi1  | Br5  | 174.18(8)  | Br4  | Bi2  | Br10 | 172.73(7)  |
| Br6  | Bi1  | Br3  | 92.12(10)  | Br9  | Bi2  | Br8  | 88.18(10)  |
| Br2  | Bi1  | Br3  | 102.63(8)  | Br7  | Bi2  | Br8  | 101.17(8)  |
| Br1  | Bi1  | Br3  | 85.55(8)   | Br4  | Bi2  | Br8  | 94.54(9)   |
| Br5  | Bi1  | Br3  | 95.77(8)   | Br10 | Bi2  | Br8  | 83.67(8)   |

**Table S11.** The bond length of the Bi-Br bond of crystal (SMBA)<sub>4</sub>Bi<sub>2</sub>Br<sub>10</sub> after heat treatment

| Atom | Atom | Length/Å   | Atom | Atom | Length/Å   |
|------|------|------------|------|------|------------|
| Bi1  | Br7  | 2.346(2)   | Bi2  | Br8  | 2.339(2)   |
| Bi1  | Br5  | 2.7545(19) | Bi2  | Br3  | 2.7956(19) |
| Bi1  | Br2  | 2.882(2)   | Bi2  | Br1  | 2.875(2)   |
| Bi1  | Br10 | 2.902(2)   | Bi2  | Br6  | 2.901(2)   |
| Bi1  | Br4  | 3.115(2)   | Bi2  | Br9  | 3.075(2)   |

**Table S12.** The Br-Bi-Br bond angles of crystal (SMBA)<sub>4</sub>Bi<sub>2</sub>Br<sub>10</sub> after heat treatment

| Atom | Atom | Atom | Angle/°   | Atom | Atom | Atom | Angle/°   |
|------|------|------|-----------|------|------|------|-----------|
| Br7  | Bi1  | Br5  | 169.15(8) | Br8  | Bi2  | Br3  | 164.65(7) |
| Br7  | Bi1  | Br2  | 90.92(8)  | Br8  | Bi2  | Br1  | 94.77(7)  |
| Br5  | Bi1  | Br2  | 83.15(7)  | Br3  | Bi2  | Br1  | 91.20(6)  |
| Br7  | Bi1  | Br10 | 96.07(8)  | Br8  | Bi2  | Br6  | 90.94(8)  |
| Br5  | Bi1  | Br10 | 90.22(7)  | Br3  | Bi2  | Br6  | 82.95(6)  |

|      |     |      |           |     |     |     |           |
|------|-----|------|-----------|-----|-----|-----|-----------|
| Br2  | Bi1 | Br10 | 172.81(6) | Br1 | Bi2 | Br6 | 174.15(6) |
| Br7  | Bi1 | Br4  | 88.10(7)  | Br8 | Bi2 | Br9 | 92.09(7)  |
| Br5  | Bi1 | Br4  | 101.41(6) | Br3 | Bi2 | Br9 | 102.50(6) |
| Br2  | Bi1 | Br4  | 94.81(6)  | Br1 | Bi2 | Br9 | 85.34(6)  |
| Br10 | Bi1 | Br4  | 83.75(6)  | Br6 | Bi2 | Br9 | 95.73(6)  |

**Table S13.** Distortion calculation of bond length and bond Angle

|            | <i>R</i> -BB | <i>S</i> -BB | <i>R</i> -BB after<br>heat treatment | <i>S</i> -BB after<br>heat treatment |
|------------|--------------|--------------|--------------------------------------|--------------------------------------|
| $\Delta d$ | 0.002806     | 0.002839     | 0.00807                              | 0.008011                             |
| $\sigma^2$ | 15.5824      | 15.6942      | 38.7871                              | 41.4208                              |

## Reference

- [1] S. Zhang, W. Jiang, R. Meyer Jr, F. Li, J. Luo, and W. Cao, *J. Appl. Phys.*, 2011, **110**, 064106.  
[2] C. Shen, H. Zhang, Y. Zhang, H. Xu, H. Yu, J. Wang and S. Zhang, *Crystals*, 2014, **4**, 141-151.
